# Supplementary material for: New topological 3D copper(ii) coordination networks: catechol oxidation catalysis and solvent adsorption via porous properties
Source: Royal Society of Chemistry journal article supplement (doi:10.1039/c5ce00087d), 2015-01-01
Supplement: c5ce00087d1.pdf [file c5ce00087d1.pdf]

<Electronic Supplementary Information>

**New topological 3D copper(II) coordination networks: catechol oxidation  
catalysis and solvent adsorption via porous properties**

**Doeon Kim, Byung Joo Kim, Tae Hwan Noh and Ok-Sang Jung\***

*Department of Chemistry, Pusan National University, Pusan 609-735, Korea*

**Refinements of structures with the SQUEEZE routine in PLATON.**

For the present copper(II) complexes, the simple solvate molecules of both complexes and the anions in case of  $[\text{Cu}_3\text{L}_4(\text{CH}_3\text{CN})_6](\text{BF}_4)_6 \cdot 16\text{H}_2\text{O} \cdot 5\text{CH}_3\text{CN}$  in the voids were highly disordered and were impossible to refine using conventional discrete-atom models. Therefore, the residual electron density was treated as diffuse contributions using the SQUEEZE of the PLATON software and located a series of voids (see below).<sup>1</sup>

For  $[\text{Cu}_3\text{L}_4(\text{CH}_3\text{CN})_6](\text{ClO}_4)_6 \cdot 19\text{H}_2\text{O} \cdot 6\text{CH}_3\text{CN}$ ,

| _platon_squeeze_void_nr              |       |       |       |      |        |
|--------------------------------------|-------|-------|-------|------|--------|
| _platon_squeeze_void_average_x       |       |       |       |      |        |
| _platon_squeeze_void_average_y       |       |       |       |      |        |
| _platon_squeeze_void_average_z       |       |       |       |      |        |
| _platon_squeeze_void_volume          |       |       |       |      |        |
| _platon_squeeze_void_count_electrons |       |       |       |      |        |
| _platon_squeeze_void_content         |       |       |       |      |        |
| 1                                    | 0.304 | 0.376 | 0.054 | 2675 | 860 '' |
| 2                                    | 0.804 | 0.876 | 0.054 | 2675 | 860 '' |
| 3                                    | 0.500 | 0.890 | 0.250 | 76   | 32 ''  |
| 4                                    | 1.000 | 0.390 | 0.250 | 76   | 32 ''  |
| 5                                    | 0.500 | 0.110 | 0.750 | 76   | 32 ''  |

```

6 1.000 0.610 0.750    76    32 ''
_platon_squeeze_details
;

```

For  $[\text{Cu}_3\text{L}_4(\text{CH}_3\text{CN})_6](\text{BF}_4)_6 \cdot 16\text{H}_2\text{O} \cdot 5\text{CH}_3\text{CN}$ ,

```

_platon_squeeze_void_nr
_platon_squeeze_void_average_x
_platon_squeeze_void_average_y
_platon_squeeze_void_average_z
_platon_squeeze_void_volume
_platon_squeeze_void_count_electrons
_platon_squeeze_void_content
1 0.003 -0.004 -0.015    6993    2368 ''
_platon_squeeze_details
;

```

### References for X-ray Crystallography:

- 1 A. L. Spek, *J. Appl. Crystallogr.*, 2003, **36**, 7-13.

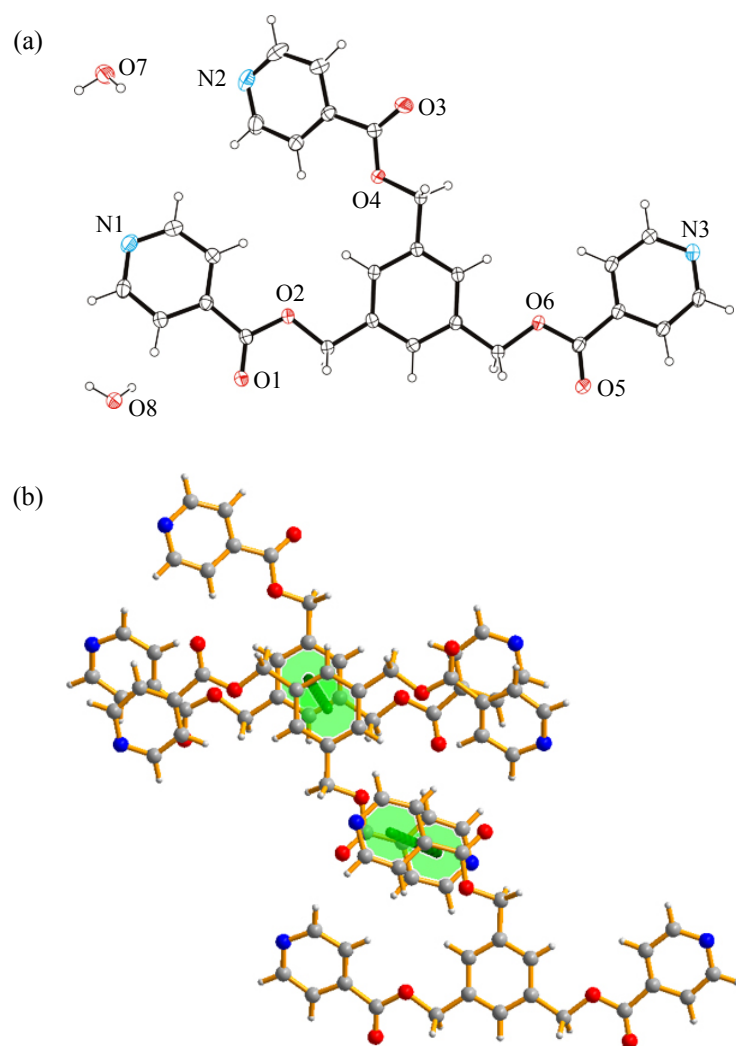

**Fig. S1** Crystal structure of L: ORTEP drawing with anisotropic displacement parameters at 30% probability (a) and partial packing diagram showing highlighted intermolecular  $\pi\cdots\pi$  interactions (b).

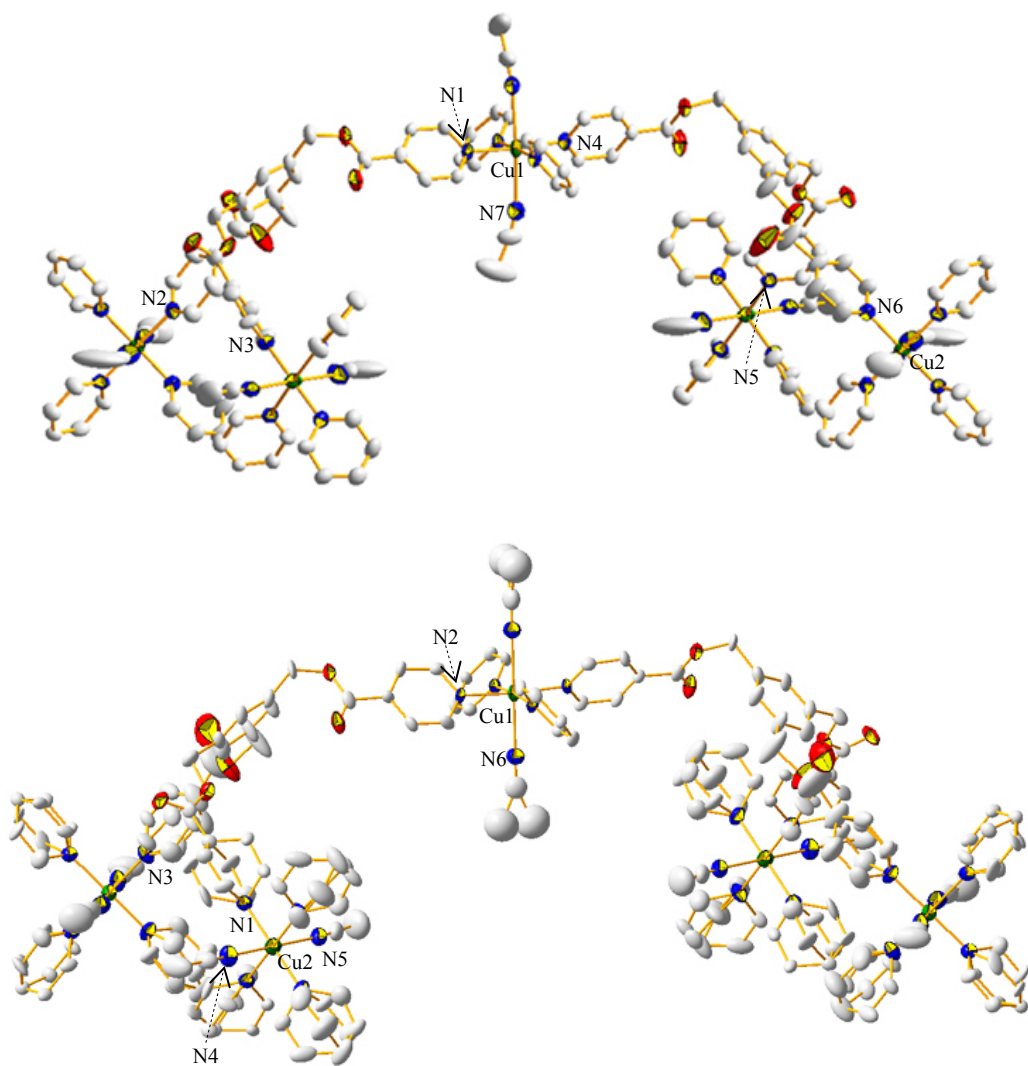

**Fig. S2** X-ray crystal structure of  $[\text{Cu}_3\text{L}_4(\text{CH}_3\text{CN})_6](\text{ClO}_4)_6 \cdot 19\text{H}_2\text{O} \cdot 6\text{CH}_3\text{CN}$  (top) and  $[\text{Cu}_3\text{L}_4(\text{CH}_3\text{CN})_6](\text{BF}_4)_6 \cdot 16\text{H}_2\text{O} \cdot 5\text{CH}_3\text{CN}$  (bottom) with anisotropic displacement parameters at 30% and 20% probabilities, respectively. The hydrogen atoms and counteranions were omitted for clarity.

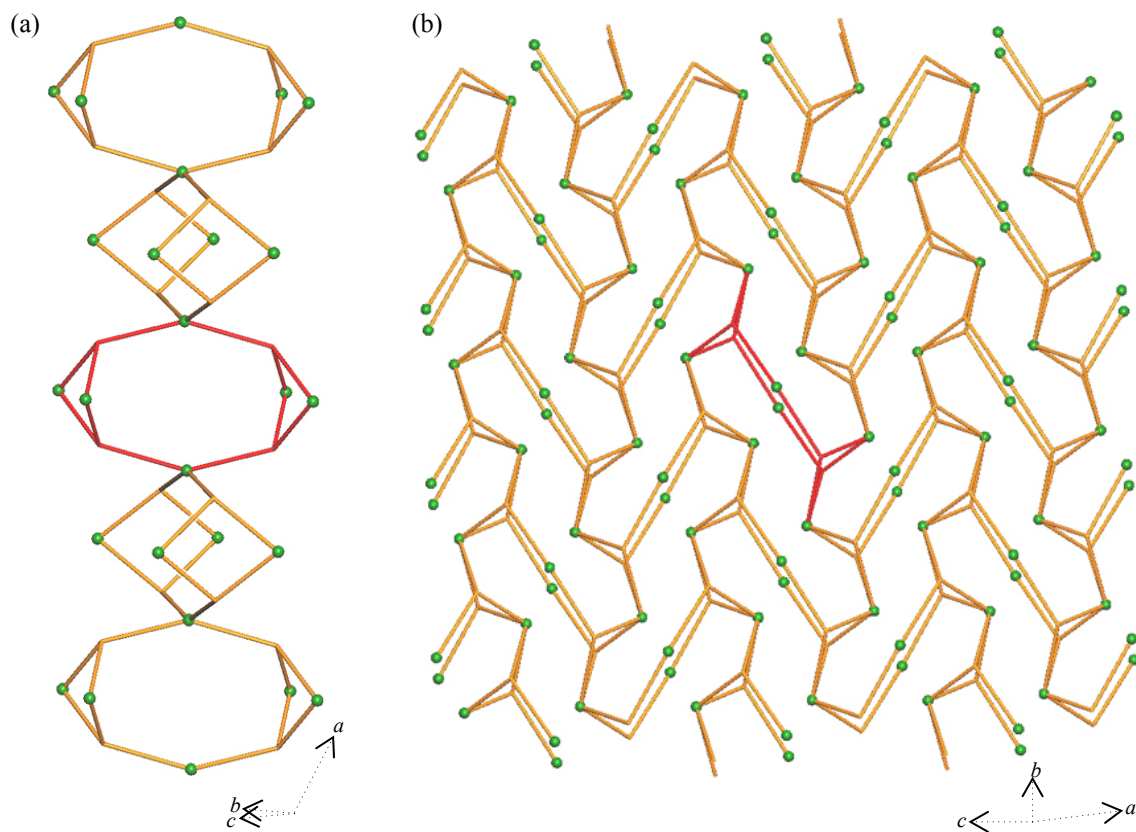

**Fig. S3** Schematic representation showing linkage of the subunits connected through Cu(1) to form 1D linked cages running perpendicular to the  $bc$ -plane (a) and linked through Cu(2) in the crystallographic  $bc$ -direction (b).

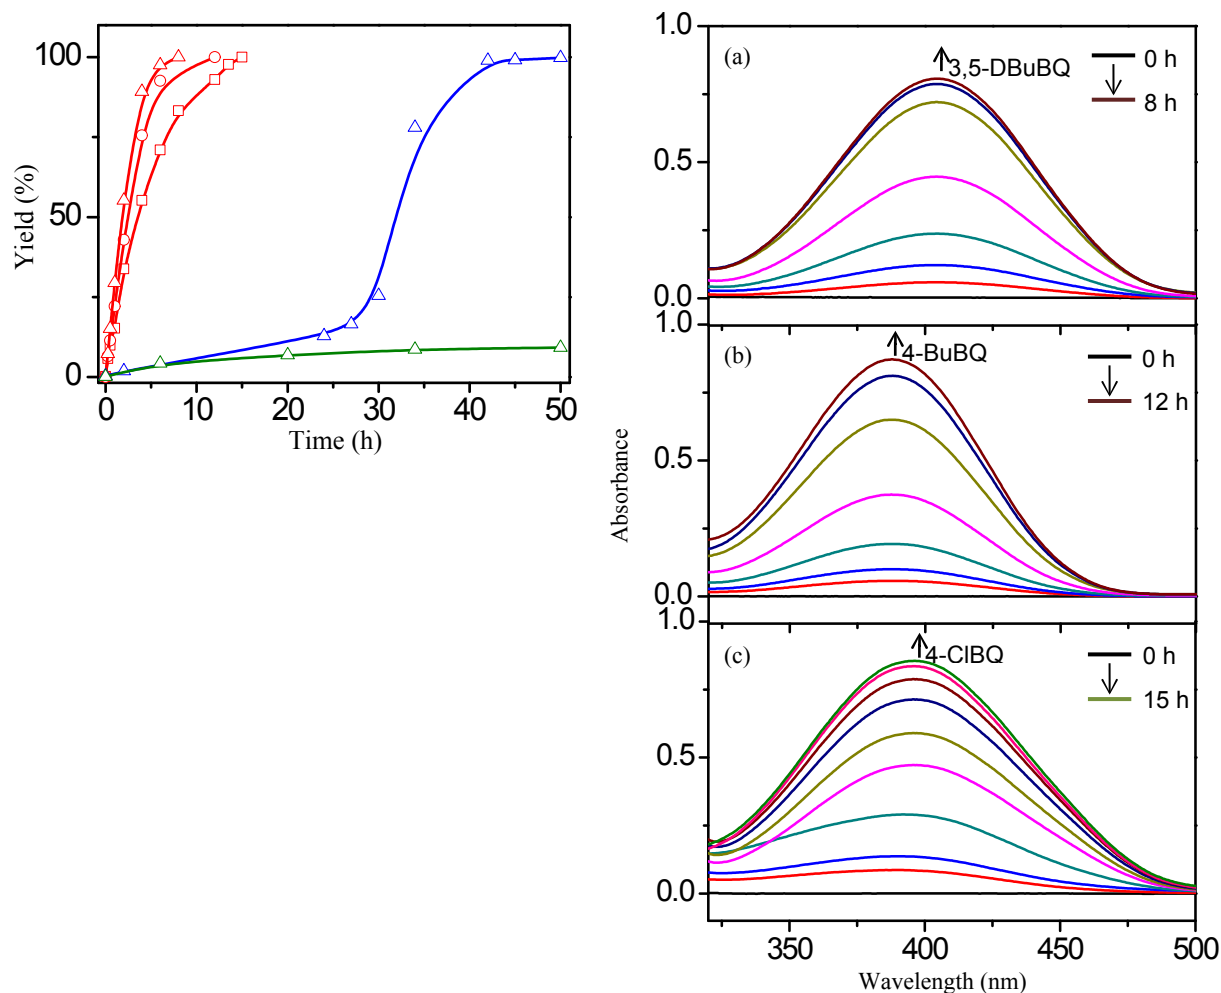

**Fig. S4** Left: plot showing catalytic yields of 3,5-DBuCat (triangles), 4-BuCat (circles), and 4-ClCat (squares) using  $[\text{Cu}_3\text{L}_4(\text{CH}_3\text{CN})_6](\text{ClO}_4)_6 \cdot 19\text{H}_2\text{O} \cdot 6\text{CH}_3\text{CN}$  (red lines), mixture of  $\text{Cu}(\text{ClO}_4)_2$  and L in 3 : 4 ratio (blue line), and only  $\text{Cu}(\text{ClO}_4)_2$  (green line) as catalysts. The [catalyst] : [catechol] ratio is 1 : 1 in  $\text{CHCl}_3$  at 40 °C. Right: UV/vis spectra showing oxidation of 3,5-DBuCat (a), 4-BuCat (b), and 4-ClCat (c) using  $[\text{Cu}_3\text{L}_4(\text{CH}_3\text{CN})_6](\text{ClO}_4)_6 \cdot 19\text{H}_2\text{O} \cdot 6\text{CH}_3\text{CN}$  as a catalyst. The [catalyst] : [catechol] ratio is 1 : 1.

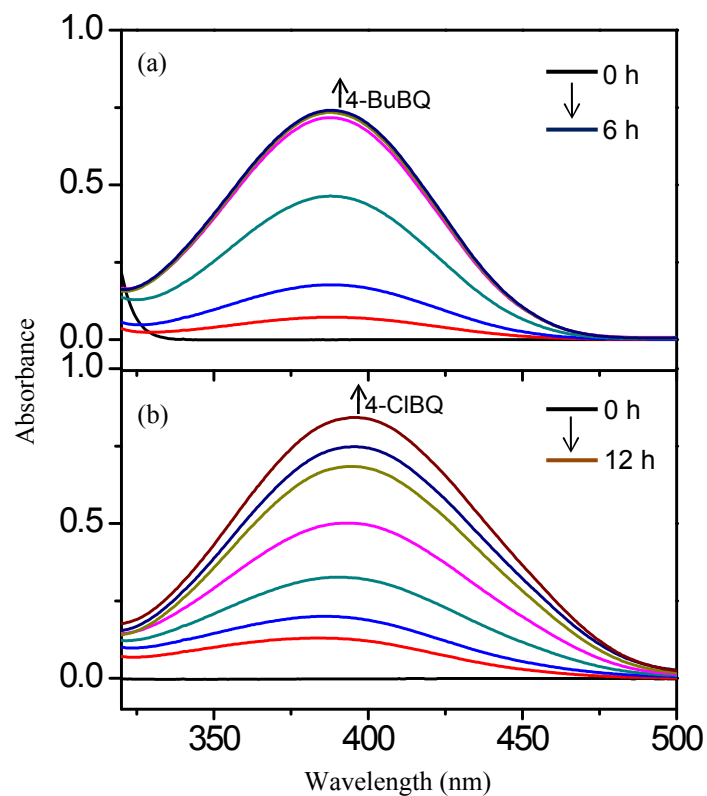

**Fig. S5** UV/vis spectra showing the oxidation of 4-BuCat (a) and 3-ClCat (b) using  $[\text{Cu}_3\text{L}_4(\text{CH}_3\text{CN})_6](\text{BF}_4)_6 \cdot 16\text{H}_2\text{O} \cdot 5\text{CH}_3\text{CN}$  as a catalyst. The [catalyst] : [catechol] ratio is 1 : 1 in  $\text{CHCl}_3$  at 40 °C.

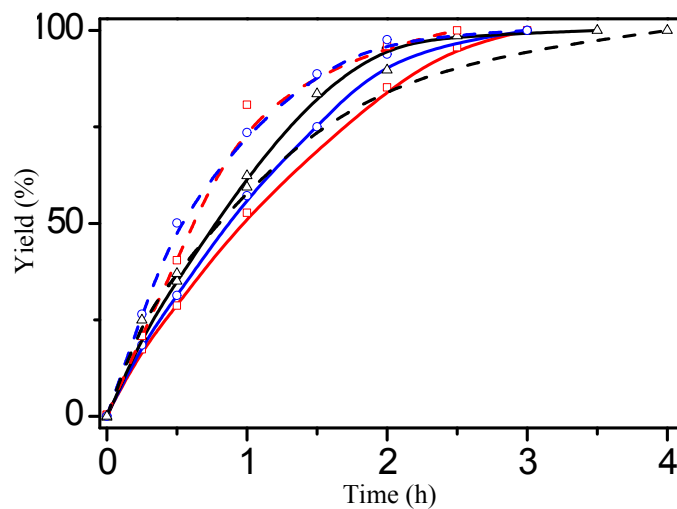

**Fig. S6** Plot showing catalytic yields of 3,5-DBuCat (red), 4-BuCat (blue), and 4-ClCat (black) using  $[\text{Cu}_3\text{L}_4(\text{CH}_3\text{CN})_6](\text{ClO}_4)_6 \cdot 19\text{H}_2\text{O} \cdot 6\text{CH}_3\text{CN}$  (solid lines) and  $[\text{Cu}_3\text{L}_4(\text{CH}_3\text{CN})_6](\text{BF}_4)_6 \cdot 16\text{H}_2\text{O} \cdot 5\text{CH}_3\text{CN}$  (dashed lines) as catalysts. The [catalyst] : [catechol] ratio is 2 : 1 in  $\text{CHCl}_3$  at 40 °C.

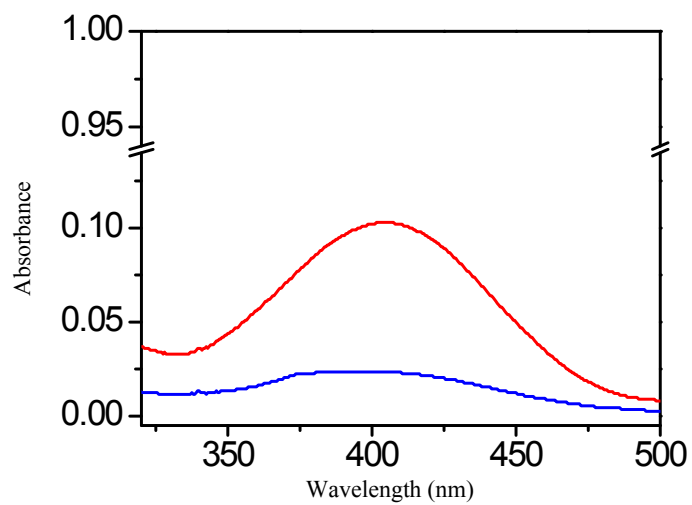

**Fig. S7** UV/vis spectra showing oxidation of 3,5-DBuCat using CuCl<sub>2</sub> (red) and CuO (blue) as catalysts in CHCl<sub>3</sub> at 40 °C. The catalytic yields are 12% and 3% for 24 h, respectively.

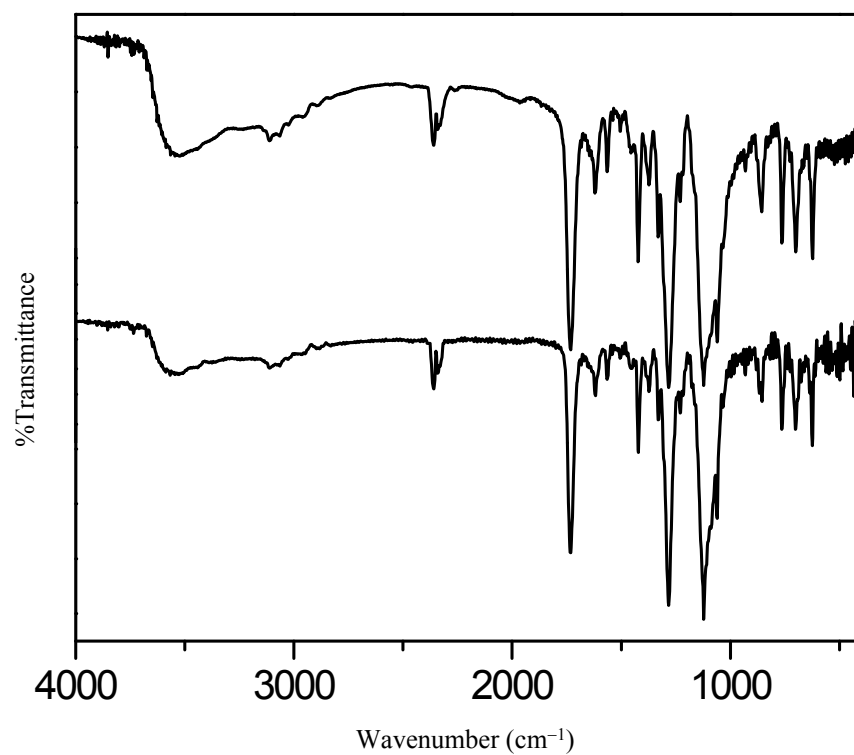

**Fig. S8** IR spectra of  $[\text{Cu}_3\text{L}_4(\text{CH}_3\text{CN})_6](\text{ClO}_4)_6 \cdot 19\text{H}_2\text{O} \cdot 6\text{CH}_3\text{CN}$  before (top) and after (bottom) catechol oxidation catalysis of 3,5-DBuCat.

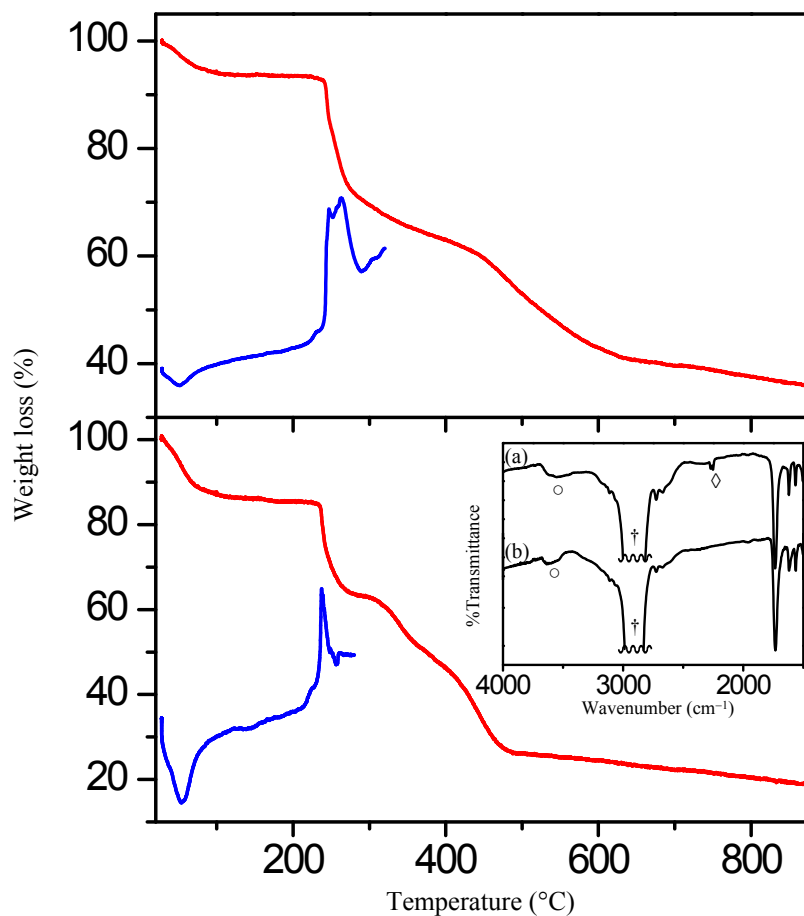

**Fig. S9** TGA (red lines) and DSC (blue lines) curves of  $[\text{Cu}_3\text{L}_4(\text{CH}_3\text{CN})_6](\text{ClO}_4)_6 \cdot 19\text{H}_2\text{O} \cdot 6\text{CH}_3\text{CN}$  (top) and  $[\text{Cu}_3\text{L}_4(\text{CH}_3\text{CN})_6](\text{BF}_4)_6 \cdot 16\text{H}_2\text{O} \cdot 5\text{CH}_3\text{CN}$  (bottom). Inset: IR spectra (Nujol mull) of as-synthesized samples (a) and acetonitrile-desolvated samples (b). The circle, rhombus, and dagger denote the vibrational frequencies corresponding to  $\tilde{\nu}_{\text{OH}}$  of water,  $\tilde{\nu}_{\text{C}\equiv\text{N}}$  of acetonitrile, and the  $sp^3$  hydrocarbon of Nujol, respectively.

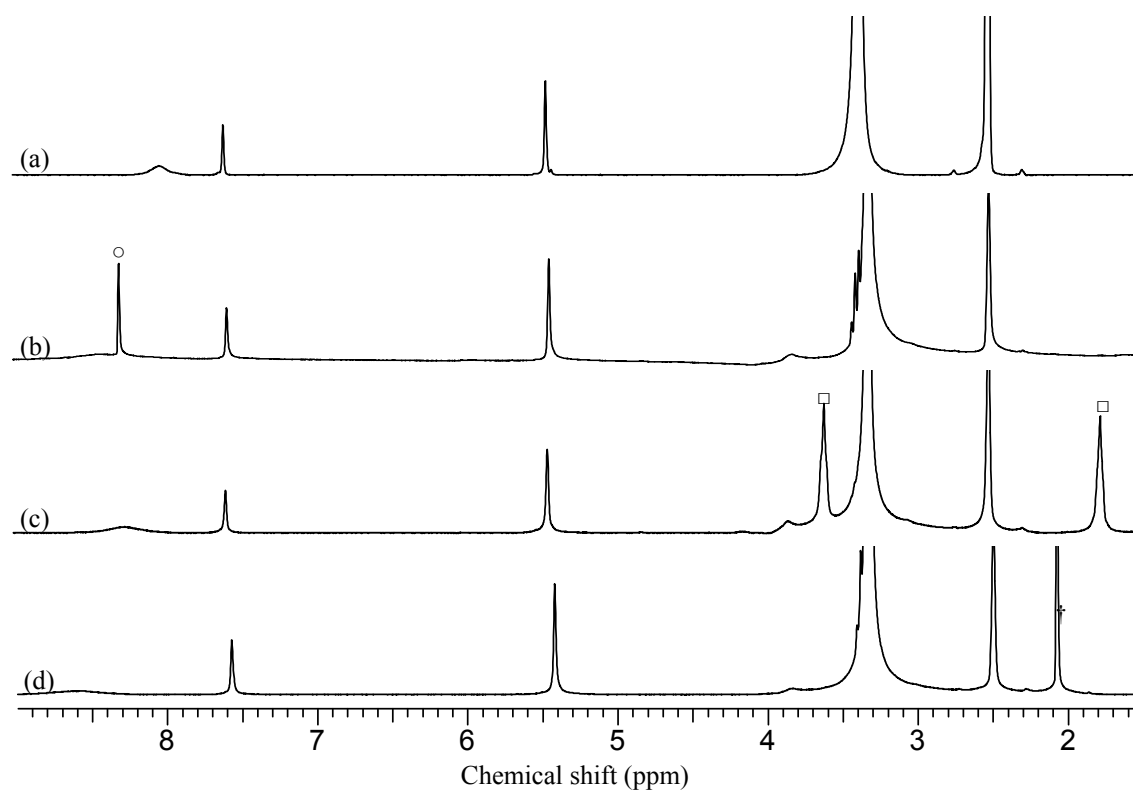

**Fig. S10**  $^1\text{H}$  NMR ( $\text{Me}_2\text{SO}-d_6$ ) spectra for the acetonitrile-desolvated  $[\text{Cu}_3\text{L}_4](\text{ClO}_4)_6 \cdot 19\text{H}_2\text{O}$  (a), and reincorporated samples  $[\text{Cu}_3\text{L}_4](\text{ClO}_4)_6 \cdot 19\text{H}_2\text{O} \cdot 12\text{CHCl}_3$  (b),  $[\text{Cu}_3\text{L}_4](\text{ClO}_4)_6 \cdot 19\text{H}_2\text{O} \cdot 13\text{THF}$  (c), and  $[\text{Cu}_3\text{L}_4](\text{ClO}_4)_6 \cdot 19\text{H}_2\text{O} \cdot 7\text{Me}_2\text{CO}$  (d). The circle, squares, and dagger denote the resonances of  $\text{CHCl}_3$ , THF, and acetone, respectively.

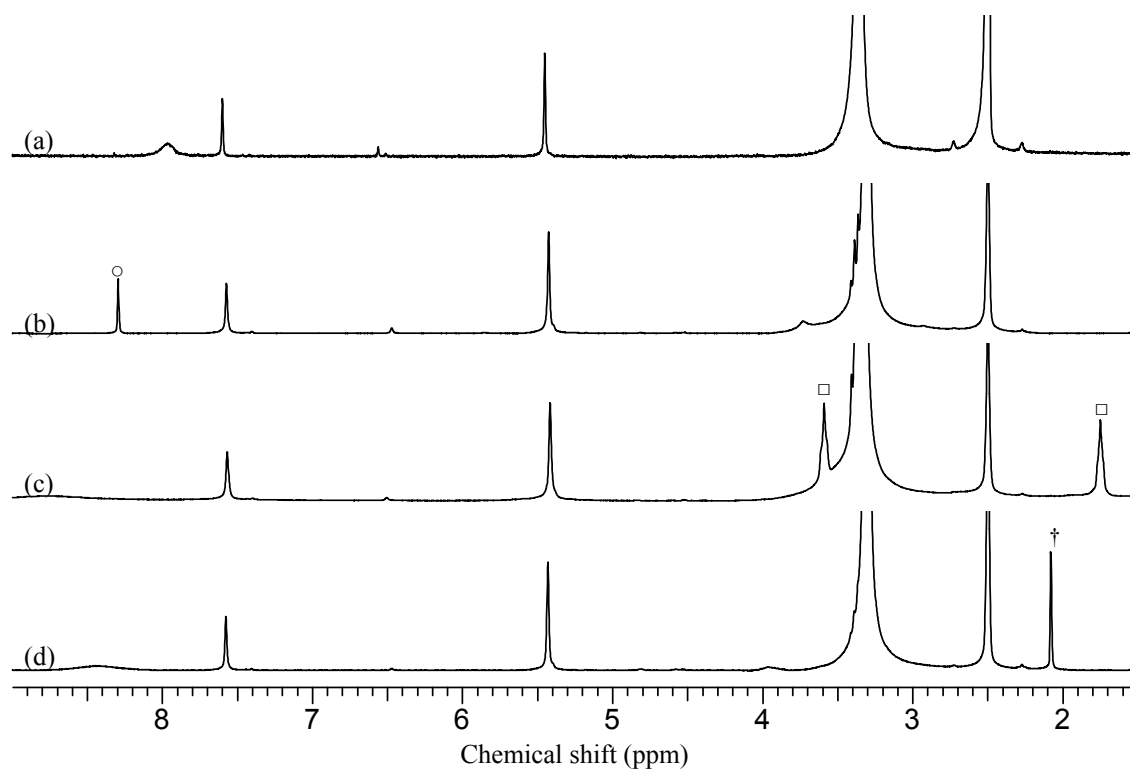

**Fig. S11**  $^1\text{H}$  NMR ( $\text{Me}_2\text{SO}-d_6$ ) spectra for the acetonitrile-desolvated  $[\text{Cu}_3\text{L}_4](\text{BF}_4)_6 \cdot 16\text{H}_2\text{O}$  (a), and reincorporated samples  $[\text{Cu}_3\text{L}_4](\text{BF}_4)_6 \cdot 16\text{H}_2\text{O} \cdot 7\text{CHCl}_3$  (b),  $[\text{Cu}_3\text{L}_4](\text{BF}_4)_6 \cdot 16\text{H}_2\text{O} \cdot 8\text{THF}$  (c), and  $[\text{Cu}_3\text{L}_4](\text{BF}_4)_6 \cdot 16\text{H}_2\text{O} \cdot 4\text{Me}_2\text{CO}$  (d). The circle, squares, and dagger denote the resonances of  $\text{CHCl}_3$ , THF, and acetone, respectively.

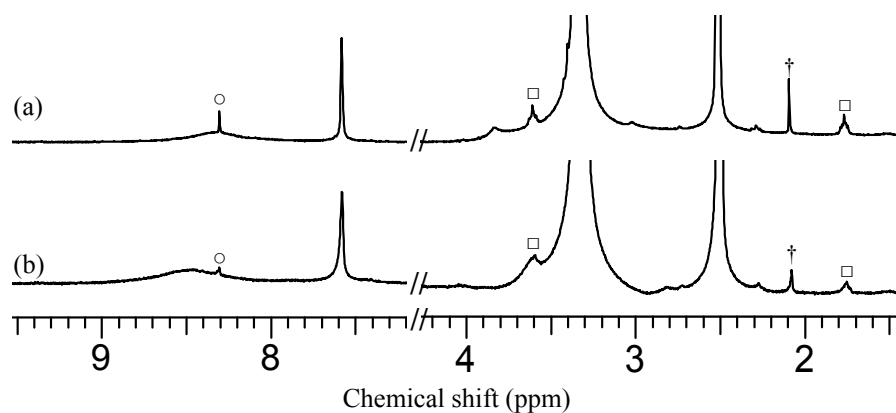

**Fig. S12**  $^1\text{H}$  NMR ( $\text{Me}_2\text{SO}-d_6$ ) spectra representing the solvent-adsorption ratio of  $[\text{Cu}_3\text{L}_4](\text{ClO}_4)_6 \cdot 19\text{H}_2\text{O}$  (a) and  $[\text{Cu}_3\text{L}_4](\text{BF}_4)_6 \cdot 16\text{H}_2\text{O}$  (b) by immersing in a mixture of  $\text{CHCl}_3$ , THF, and acetone ( $v/v/v = 1:1:1$ ). The circles, squares, and daggers denote the resonances of  $\text{CHCl}_3$ , THF, and acetone, respectively.
